# Supplementary material
Source: publisher site journal article supplement (https://www.dovepress.com/article/312853)
Supplement: Supplementary file 1 [file get_supplementary_file.php]

# **Supplementary Appendix**

**Supplementary Table 1** COPD diagnosis codes

| **Read code** | **Description** |
| --- | --- |
| H32..00 | Emphysema |
| H3...11 | Chronic obstructive airways disease |
| H3...00 | Chronic obstructive pulmonary disease |
| H312200 | Acute exacerbation of chronic obstructive airways disease |
| 663K.00 | Airways obstruction irreversible |
| H3z..00 | Chronic obstructive airways disease NOS |
| H3y1.00 | Chron obstruct pulmonary dis with acute exacerbation, unspec |
| 66YB.00 | Chronic obstructive pulmonary disease monitoring |
| H38..00 | Severe chronic obstructive pulmonary disease |
| H37..00 | Moderate chronic obstructive pulmonary disease |
| H36..00 | Mild chronic obstructive pulmonary disease |
| H322.00 | Centrilobular emphysema |
| 8H2R.00 | Admit COPD emergency |
| 66YM.00 | Chronic obstructive pulmonary disease annual review |
| H3y..00 | Other specified chronic obstructive airways disease |
| H312100 | Emphysematous bronchitis |
| 66YL.11 | COPD follow-up |
| 66YL.00 | Chronic obstructive pulmonary disease follow-up |
| 9Oi..00 | Chronic obstructive pulmonary disease monitoring admin |
| 66Ye.00 | Emergency COPD admission since last appointment |
| 66Yd.00 | COPD accident and emergency attendance since last visit |
| H3y0.00 | Chronic obstruct pulmonary dis with acute lower resp infectn |
| H320z00 | Chronic bullous emphysema NOS |
| 66YS.00 | Chronic obstructive pulmonary disease monitoring by nurse |
| H320.00 | Chronic bullous emphysema |
| H312.00 | Obstructive chronic bronchitis |
| 66Yf.00 | Number of COPD exacerbations in past year |
| 9Oi0.00 | Chronic obstructive pulmonary disease monitoring 1st letter |
| H32z.00 | Emphysema NOS |
| 9Oi1.00 | Chronic obstructive pulmonary disease monitoring 2nd letter |
| 9Oi2.00 | Chronic obstructive pulmonary disease monitoring 3rd letter |
| H3z..11 | Chronic obstructive pulmonary disease NOS |
| 66YD.00 | Chronic obstructive pulmonary disease monitoring due |
| 9Oi4.00 | Chronic obstructive pulmonary disease monitor phone invite |
| 9Oi3.00 | Chronic obstructive pulmonary disease monitoring verb invite |
| 679V.00 | Health education - chronic obstructive pulmonary disease |
| H312z00 | Obstructive chronic bronchitis NOS |
| 66Yg.00 | Chronic obstructive pulmonary disease disturbs sleep |
| 66Yh.00 | Chronic obstructive pulmonary disease does not disturb sleep |
| 8CR1.00 | Chronic obstructive pulmonary disease clinical management plan |
| 66YT.00 | Chronic obstructive pulmonary disease monitoring by doctor |
| 66Yi.00 | Multiple COPD emergency hospital admissions |
| H39..00 | Very severe chronic obstructive pulmonary disease |
| 9kf0.00 | COPD patient unsuitable for pulmonary rehabilitation - enhanced serv admin |
| 8BMW.00 | Issue of chronic obstructive pulmonary disease rescue pack |
| 66YB000 | Chronic obstructive pulmonary disease 3-monthly review |
| 66YB100 | Chronic obstructive pulmonary disease 6-monthly review |
| 9kf1.11 | Referred for COPD structured smoking assessment |
| 8BMa000 | Chronic obstructive pulmonary disease medication optimization |
| 661M300 | COPD self-management plan agreed |
| 661N300 | COPD self-management plan review |
| 8CMV.00 | Has chronic obstructive pulmonary disease care plan |
| H3A..00 | End-stage chronic obstructive airways disease |
| **ICD-10** |  |
| J410 | Simple chronic bronchitis |
| J411 | Mucopurulent chronic bronchitis |
| J418 | Mixed simple and mucopurulent chronic bronchitis |
| J42X | Unspecified chronic bronchitis |
| J430 | MacLeod syndrome |
| J431 | Panlobular emphysema |
| J432 | Centrilobular emphysema |
| J438 | Other emphysema |
| J439 | Emphysema, unspecified |
| J440 | Chronic obstructive pulmonary disease with acute lower respiratory infection |
| J441 | Chronic obstructive pulmonary disease with acute exacerbation, unspecified |
| J449 | Chronic obstructive pulmonary disease, unspecified |

**Abbreviations:** COPD, chronic obstructive pulmonary disease; NOS, not otherwise specified.
